# Supplementary material for: Antibacterial Activity and Cytotoxicity of Silver(I) Complexes of Pyridine and (Benz)Imidazole Derivatives. X-ray Crystal Structure of [Ag(2,6-di(CH2OH)py)2]NO3
Source: PubMed Central journal article supplement (PMC6274122; doi:10.3390/molecules21020087), 2016-01-28
Supplement: molecules-21-00087-s001.pdf [file molecules-21-00087-s001.pdf]

# Supplementary Materials: Antibacterial Activity and Cytotoxicity of Silver(I) Complexes of Pyridine and (Benz)Imidazole Derivatives. X-ray Crystal Structure of $[\text{Ag}(\text{2,6-di}(\text{CH}_2\text{OH})\text{py})_2]\text{NO}_3$

Urszula Kalinowska-Lis, Aleksandra Felczak, Lilianna Chęcińska, Iłona Szabłowska-Gadomska, Emila Patyna, Maciej Małecki, Katarzyna Lisowska and Justyn Ochocki

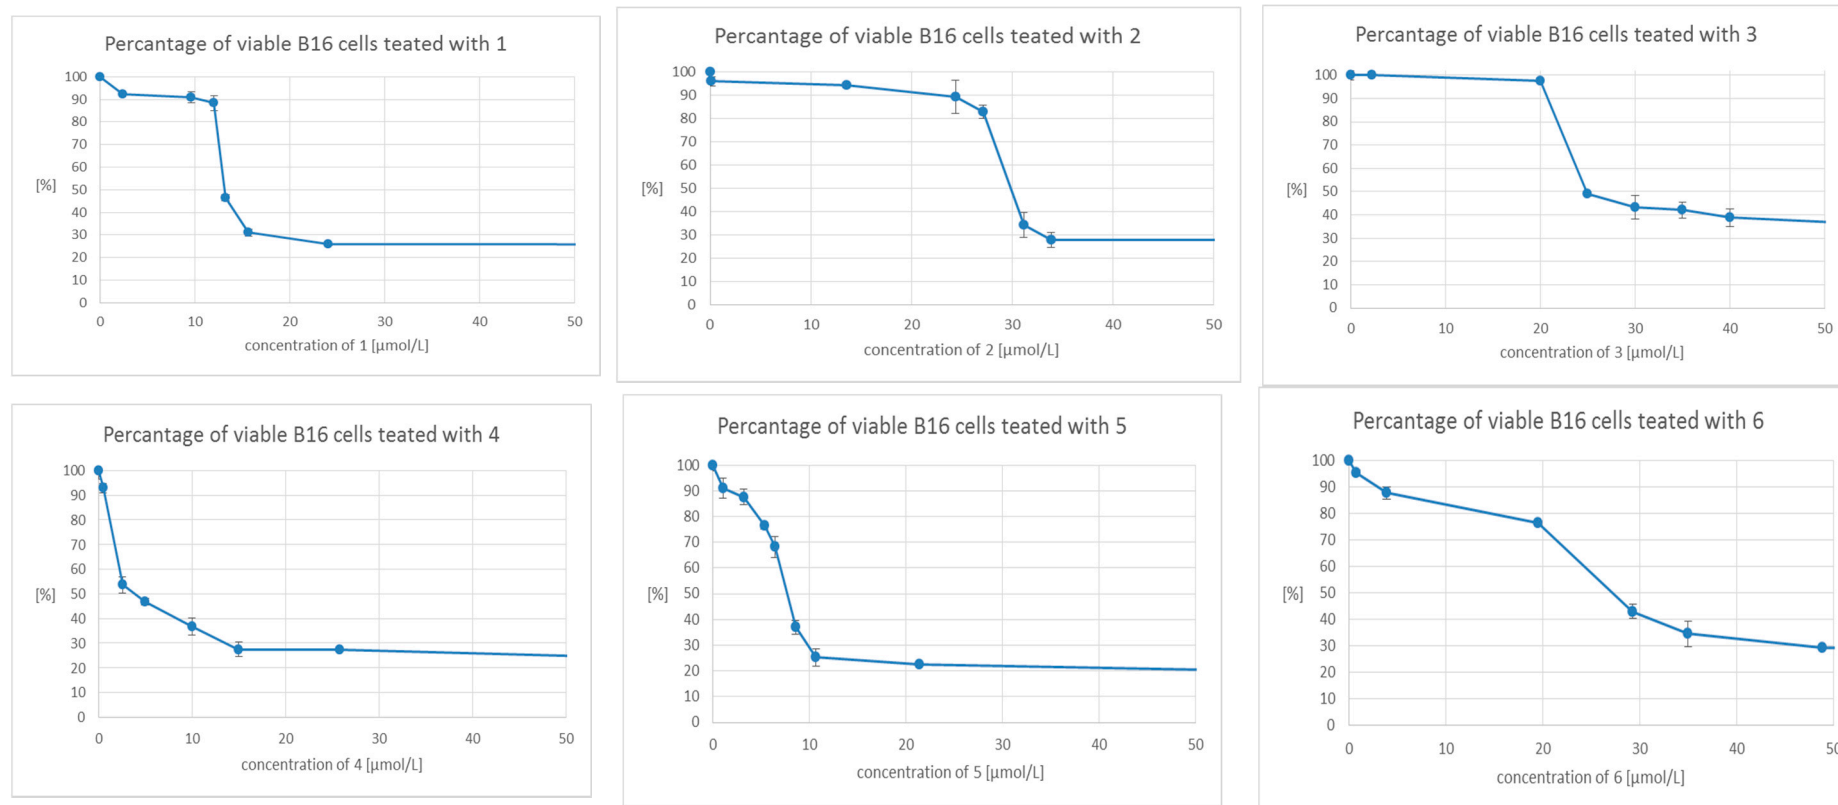

Figure S1. Cont.

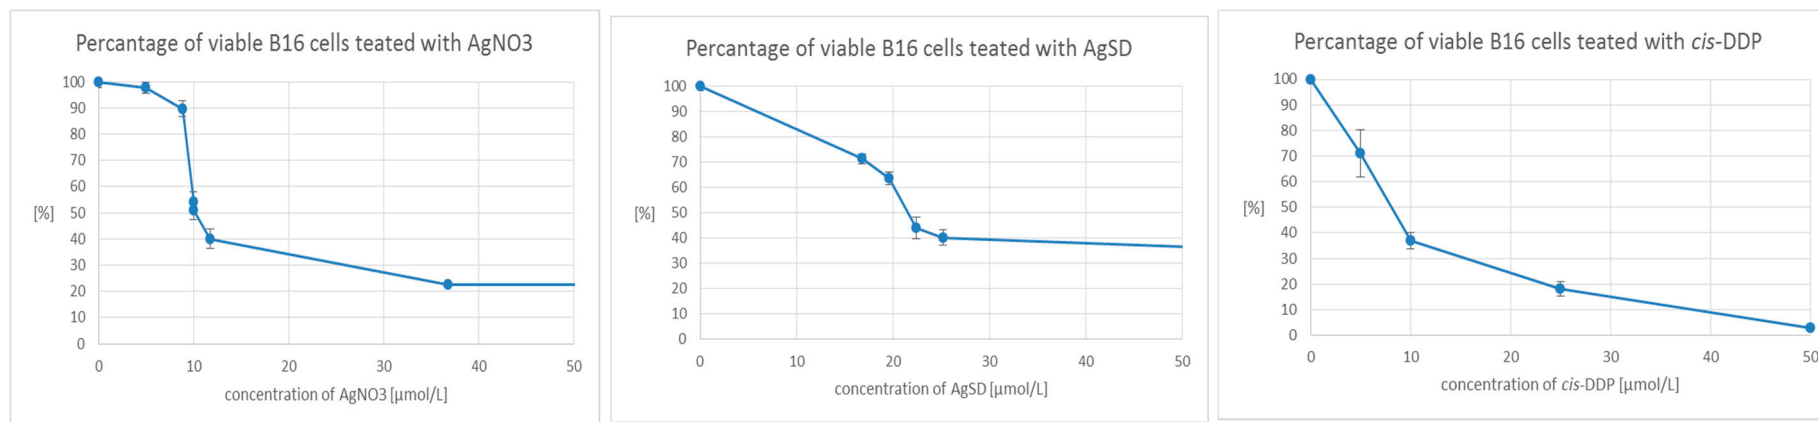

**Figure S1.** Cytotoxic activity of the silver(I) complexes **1–6** and referenced compounds:  $\text{AgNO}_3$ , AgSD (silver sulfadiazine) and *cis*-DDP (cisplatin) towards B16 murine melanoma cell lines. Results obtained by means of MTT assay and shown as mean value  $\pm$  SD.
